# Supplementary material for: Principal Components and Cluster Analysis of Trace Elements in Buckwheat Flour
Source: MDPI journal article supplement (doi:10.3390/foods12010225), 2023-01-03
Supplement: s1 [file s1]

**Table S1.** Name, Source and Trace Element Content of 28 Buckwheat Samples.

| Buckwheat No.          | Collection Place                 | Mg (μg/g)   | Ca (μg/g)   | Fe (μg/g)   | Zn ( μg/g) | Mn ( μg/g) | Cu ( μg/g) | Se ( μg/g) | Mo ( μg/g) | Cd ( μg/g) |
|------------------------|----------------------------------|-------------|-------------|-------------|------------|------------|------------|------------|------------|------------|
|                        | Aba                              |             |             |             |            |            |            |            |            |            |
| <i>F. esculentum</i> 1 | Prefecture, Sichuan Province     | 248.8±24.9  | 177.49±17.6 | 62.23±6.2   | 39.08±3.9  | 10.08±1    | 9.98±1.01  | 1.41±0.14  | 0.35±0.03  | 0.03       |
| <i>F. esculentum</i> 2 | Xichang City, Sichuan Province   | 247.25±24.6 | 304.9±30.4  | 83.5±8.2    | 26.24±2.7  | 10.15±1.1  | 7.84±0.78  | 1.46±0.15  | 0.3±0.03   | 0.05       |
| <i>F. esculentum</i> 3 | Shuiche County, Guizhou Province | 249.38±25   | 120.54±12   | 67.16±6.6   | 36.09±3.6  | 10.29±1    | 10.4±1.05  | 0.34±0.03  | 0.33±0.03  | 0.03       |
| <i>F. esculentum</i> 4 | Weining County, Guizhou Province | 249.72±26   | 144.37±14.5 | 55.91±5.6   | 35.21±3.51 | 10.15±1.1  | 12.76±1.2  | 0.72±0.07  | 0.31±0.03  | 0.03       |
| <i>F. esculentum</i> 5 | Zunyi City, Guizhou Province     | 248.92±24.5 | 154.61±15.5 | 59.03±5.8   | 39.3±3.9   | 10.32±1.1  | 9.61±0.96  | 0.76±0.07  | 0.32±0.03  | 0.03       |
| <i>F. esculentum</i> 6 | Xi'an City, Shanxi Province      | 244.78±24.3 | 159.85±16   | 70.99±6.98  | 30.54±3    | 9.36±0.9   | 8.51±0.84  | 0.9±0.08   | 0.37±0.04  | 0.02       |
| <i>F. esculentum</i> 7 | Xi'an City, Shanxi Province      | 246.76±24.4 | 320.93±32   | 112.78±11.3 | 33.14±3.4  | 9.67±0.96  | 7.44±0.75  | 0.75±0.08  | 0.4±0.04   | 0.02       |
| <i>F. esculentum</i> 8 | Jiujiang City, Jiangxi Province  | 248.2±25    | 132.57±13   | 65.68±6.6   | 35.84±3.6  | 10.09±1.08 | 8.83±0.87  | 1.30±0.1   | 0.39±0.04  | 0.04       |
| <i>F. tataricum</i> 1  | Jiujiang City, Jiangxi Province  | 247.29±24.7 | 218.41±22   | 92.02±9.3   | 11.54±1.54 | 11.54±1.2  | 6.48±0.6   | 0.82±0.08  | 0.29±0.03  | 0.02       |
| <i>F.</i>              | Xi'an                            | 249.15±2    | 274.52±2    | 81.69±8.2   | 9.53±0.9   | 9.53±0.9   | 7.29±0.7   | 0.77±0.0   | .39±0.0    | 0.0        |

|                                  |                                           |           |          |           |          |          |          |         |         |     |
|----------------------------------|-------------------------------------------|-----------|----------|-----------|----------|----------|----------|---------|---------|-----|
| <i>tataricum</i> 2               | City,<br>Shanxi<br>Province<br>Xi'an      | 5         | 7.5      |           | 6        | 6        | 2        | 08      | 4       | 2   |
| <i>F.</i><br><i>tataricum</i> 3  | City,<br>Shanxi<br>Province<br>Weining    | 247.81±2  | 280.24±2 | 110.17±1  | 9.84±1.1 | 9.84±0.9 | 5.83±0.5 | 0.68±0. | 0.36±0. | 0.0 |
| <i>F.</i><br><i>tataricum</i> 4  | County,<br>Guizhou<br>Province<br>Weining | 247.01±2  | 168.2±17 | 70.15±6.9 | 9.68±0.9 | 9.68±0.9 | 6.32±0.6 | 0.41±0. | 0.31±0. | 0.1 |
| <i>F.</i><br><i>tataricum</i> 5  | County,<br>Guizhou<br>Province<br>Weining | 246.4±24. | 144.01±1 | 56.84±5.8 | 9.82±0.9 | 9.82±0.9 | 6.82±0.6 | 0.94±0. | 0.3±0.0 | 0.0 |
| <i>F.</i><br><i>tataricum</i> 6  | County,<br>Guizhou<br>Province<br>Weining | 245.94±2  | 164.62±1 | 82.83±8.4 | 9.76±0.9 | 9.76±0.9 | 8.49±0.8 | 0.51±0. | 0.35±0. | 0.0 |
| <i>F.</i><br><i>tataricum</i> 7  | County,<br>Guizhou<br>Province<br>Weining | 248.62±2  | 151±15   | 93.78±9.4 | 10.4±0.9 | 10.4±1.0 | 10.77±1. | 0.46±0. | 0.34±0. | 0.0 |
| <i>F.</i><br><i>tataricum</i> 8  | County,<br>Guizhou<br>Province<br>Zhaoton | 236.02±2  | 158.9±16 | 57.51±5.7 | 9.57±0.9 | 9.57±0.9 | 6.65±0.6 | 0.54±0. | 0.32±0. | 0.0 |
| <i>F.</i><br><i>tataricum</i> 9  | g City,<br>Yunnan<br>Province<br>Zhaoton  | 247.67±2  | 165.15±1 | 69.39±6.9 | 9.69±0.9 | 9.69±0.9 | 9.35±0.9 | 0.67±0. | 0.34±0. | 0.0 |
| <i>F.</i><br><i>tataricum</i> 10 | g City,<br>Yunnan<br>Province<br>Xichang  | 237.79±2  | 218.11±2 | 67.83±6.8 | 9.34±0.9 | 9.34±0.9 | 7.29±0.7 | 0.68±0. | 0.32±0. | 0.0 |
| <i>F.</i><br><i>tataricum</i> 11 | City,<br>Sichuan<br>Province<br>Guiyang   | 246.82±2  | 210.55±2 | 75.25±7.5 | 10.5±1.0 | 10.5±1.0 | 6.05±0.7 | 0.68±0. | 0.37±0. | 0.0 |
| <i>F.</i><br><i>tataricum</i> 12 | City,<br>Guizhou<br>Province              | 237.3±23. | 284.41±2 | 59.03±5.9 | 10.04±0. | 10.04±1. | 4.36±0.4 | 0.52±0. | 0.32±0. | 0.0 |
| <i>F.</i>                        | Shuiche                                   | 244.51±2  | 267.85±2 | 93.4±9.3  | 10.48±1. | 10.48±1. | 7.74±0.7 | 0.65±0. | 0.32±0. | 0.1 |

|                           |                                               |          |          |           |               |                |               |               |               |          |
|---------------------------|-----------------------------------------------|----------|----------|-----------|---------------|----------------|---------------|---------------|---------------|----------|
| <i>tataricum1</i><br>3    | ng<br>County,<br>Guizhou<br>Province<br>Zunyi | 4.6      | 6.6      |           | 05            | 05             | 9             | 06            | 03            | 1        |
| <i>F. tataricum1</i><br>4 | City,<br>Guizhou<br>Province<br>Xichang       | 245.77±2 | 225.32±2 | 68.72±6.9 | 10.53±1.<br>1 | 10.53±1.<br>05 | 8.88±0.9      | 0.77±0.<br>07 | 0.29±0.<br>03 | 0.1      |
| <i>F. gracilipes1</i>     | City,<br>Sichuan<br>Province<br>Xichang       | 250.18±2 | 315.75±3 | 81.65±8.4 | 9.04±0.9      | 9.04±0.9       | 8.56±0.8<br>8 | 0.32±0.<br>03 | 0.31±0.<br>03 | 0.0<br>6 |
| <i>F. gracilipes2</i>     | City,<br>Sichuan<br>Province<br>Ya'an         | 248.13±2 | 288.94±2 | 82.83±8.3 | 9.96±0.9<br>8 | 9.96±0.9<br>9  | 9.46±0.9<br>7 | 0.63±0.<br>06 | 0.28±0.<br>03 | 0.1<br>1 |
| <i>F. gracilipes3</i>     | City,<br>Sichuan<br>Province<br>Xichang       | 249.57±2 | 343.98±3 | 64.13±6.3 | 10.62±1.<br>1 | 10.62±1.<br>08 | 7.67±0.7<br>8 | 0.28±0.<br>02 | 0.29±0.<br>03 | 0.0<br>8 |
| <i>F. densovillosum</i>   | City,<br>Sichuan<br>Province<br>Xichang       | 249.59±2 | 276.43±2 | 64.14±6.4 | 9.78±0.9<br>7 | 9.78±0.9<br>7  | 8.21±0.8<br>3 | 0.97±0.<br>1  | 0.31±0.<br>03 | 0.1<br>3 |
| <i>F. dibotrys1</i>       | City,<br>Sichuan<br>Province<br>Ya'an         | 248.53±2 | 188.63±1 | 60.25±6   | 9.64±0.9      | 9.64±0.9<br>6  | 6.67±0.8      | 0.63±0.<br>06 | 0.28±0.<br>03 | 0.0<br>6 |
| <i>F. dibotrys2</i>       | City,<br>Sichuan<br>Province                  | 247.04±2 | 205.54±2 | 61.93±6.3 | 9.96±1.0<br>2 | 9.96±1.0<br>2  | 5.73±0.5<br>8 | 1.15±0.<br>1  | 0.29±0.<br>03 | 0.0<br>3 |
